# Supplementary material
Source: PubMed Central journal article supplement (PMC6301330)
Supplement: ja7b12343_si_001.pdf [file ja7b12343_si_001.pdf]

# Chemical Exchange Saturation Transfer in Chemical Reactions: A Mechanistic Tool for NMR Detection and Characterization of Transient Intermediates.

N. Lokesh, Andreas Seegerer, Johnny Hioe and Ruth M. Gschwind\*.

Institute of Organic Chemistry, University of Regensburg, D-93053 Regensburg, Germany

## Contents

|     |                                                                                                |    |
|-----|------------------------------------------------------------------------------------------------|----|
| 1.  | General information .....                                                                      | 2  |
| 2.  | Synthesis of DPU-d <sub>10</sub> .....                                                         | 2  |
| 3.  | Sample preparation.....                                                                        | 2  |
| 4.  | NMR spectroscopic investigations in the absence of DPU at 300-215 K.....                       | 2  |
| 5.  | NMR spectroscopic investigations in the presence of DPU.....                                   | 3  |
| 6.  | Charge and bond length analysis.....                                                           | 6  |
| 7.  | Effect of temperature on <i>E</i> -Iminium population in presence of DPU (1 equivalent).....   | 7  |
| 8.  | 1D <sup>1</sup> H EXSY studies to obtain rate constants and free energy barriers at 300 K..... | 8  |
| 9.  | <sup>1</sup> H CEST pulse sequence .....                                                       | 9  |
| 10. | Possible intermediate probes to detect iminium ion in the system.....                          | 10 |
| 11. | Bloch-McConnell equations for two site exchange.....                                           | 11 |
| 12. | CEST spectra (profile) simulation details .....                                                | 12 |
| 13. | Details of theoretical calculations .....                                                      | 13 |
| 14. | References .....                                                                               | 21 |

## 1. General information

The chemicals for this study were purchased from Sigma Aldrich and Deutero and were used without further purification. DPU-d<sub>10</sub> was synthesized according to the following procedure. All NMR experiments were performed at 213-300 K on a Bruker Avance III Nanobay 400 and a Bruker Avance III 600 (600.25 MHz) with a fluorine selective TBIF probe or a phosphorous selective TBIP probe. All spectra were processed and evaluated with Bruker Topspin 3.2.

## 2. Synthesis of DPU-d<sub>10</sub>

In a flame dried Schlenk flask, under argon atmosphere triphosgene (0.1 equiv., 617.3 mg, 2.1 mmol) was dissolved in THF (20 ml) and was cooled to 0 °C. A mixture of aniline-d<sub>5</sub> (C<sub>5</sub>D<sub>5</sub>NH<sub>2</sub>; 1.0 equiv., 2.15 g, 21.9 mmol) and NEt<sub>3</sub> (1.5 equiv., 4.5 ml, 32.5 mmol) in THF (20 ml) was added drop wise. After stirring the reaction mixture for 30 minutes at 0 °C, it was allowed to warm up to room temperature. After 1 h white precipitate was formed. The solution was washed with an aqueous NaHCO<sub>3</sub> solution (sat.) and the organic phase was separated. The aqueous phase was washed with EtOAc. The combined organic phases were dried over Na<sub>2</sub>SO<sub>4</sub>, filtered and the solvent was removed under reduced pressure. The crude product was washed with Et<sub>2</sub>O and dried under vacuum to give the white product (1.1 g, 78%). Due to the partial incomplete deuteration of the aromatic protons, small signals for the aromatic protons could be detected. The amine protons showed higher signal intensities.

<sup>1</sup>H-NMR (400MHz, DMSO-d<sub>6</sub>) [ppm]: 6.96 (s, H<sub>arom</sub>), 7.27 (s, H<sub>arom</sub>), 7.44 (s, H<sub>arom</sub>), 8.66 (s, 2H, NH)

<sup>13</sup>C-NMR (100MHz, DMSO-d<sub>6</sub>) [ppm]: 117.7 (C<sub>arom</sub>), 127.9 (C<sub>arom</sub>), 128.2 (C<sub>arom</sub>), 139.5 (C<sub>arom</sub>), 152.4 (C=O)

## 3. Sample preparation

All samples in this study were prepared by dissolving L-proline (1 equiv.; 50 or 100 mM), 3-methylbutanal (1 equiv.) and diphenylurea (DPU) in 0.6 ml DMF-d<sub>7</sub> in a 5 mm standard NMR tube. If not otherwise indicated 1 equiv. of DPU or DPU-d<sub>10</sub> was used.

## 4. NMR spectroscopic investigations in the absence of DPU at 300-215 K.

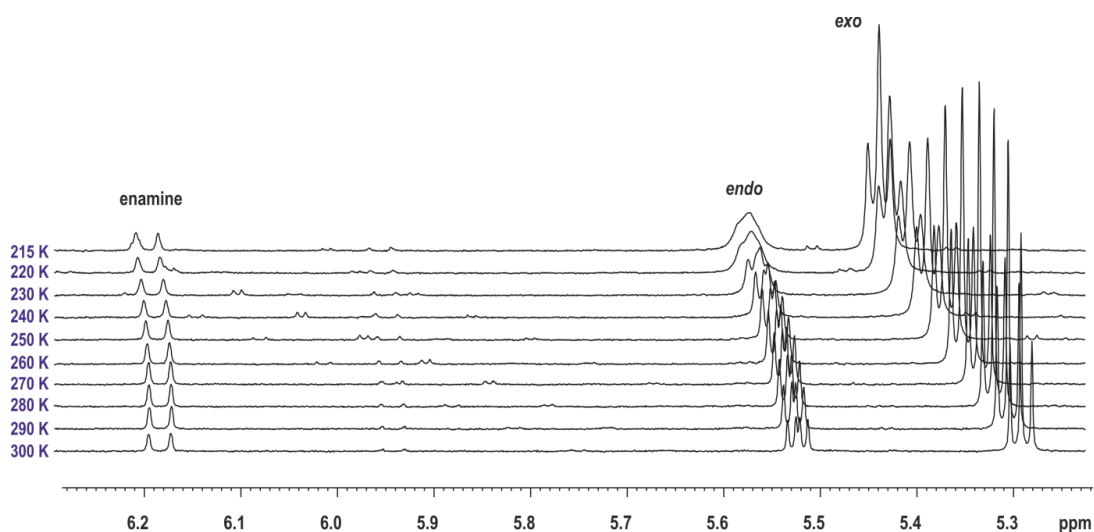

**S 1:** Stacked part of the 1D <sup>1</sup>H spectra of the reaction mixture of L-proline (1 equiv.) and 3-methylbutanal (1 equiv.) in DMF-d<sub>7</sub> at 300-215 K, showing H<sub>1</sub> proton chemical shift of intermediates *exo*-, *endo*-oxazolidinone and enamine.

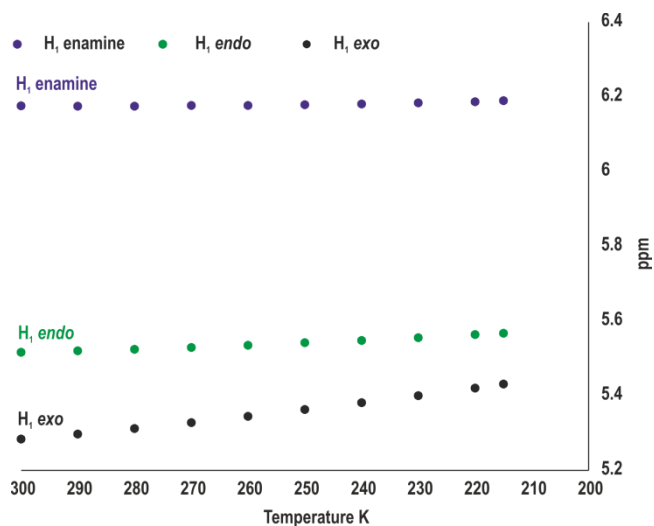

**S 2:** Plot of temperature dependent shift for H<sub>1</sub> protons of *endo*-, *exo*-oxazolidinone and enamine in a reaction mixture of L-proline (1 equiv.) and 3-methylbutanal (1 equiv.) in DMF-d<sub>7</sub> at 300-215 K. In the absence of DPU the shift is not significant.

## 5. NMR spectroscopic investigations in the presence of DPU

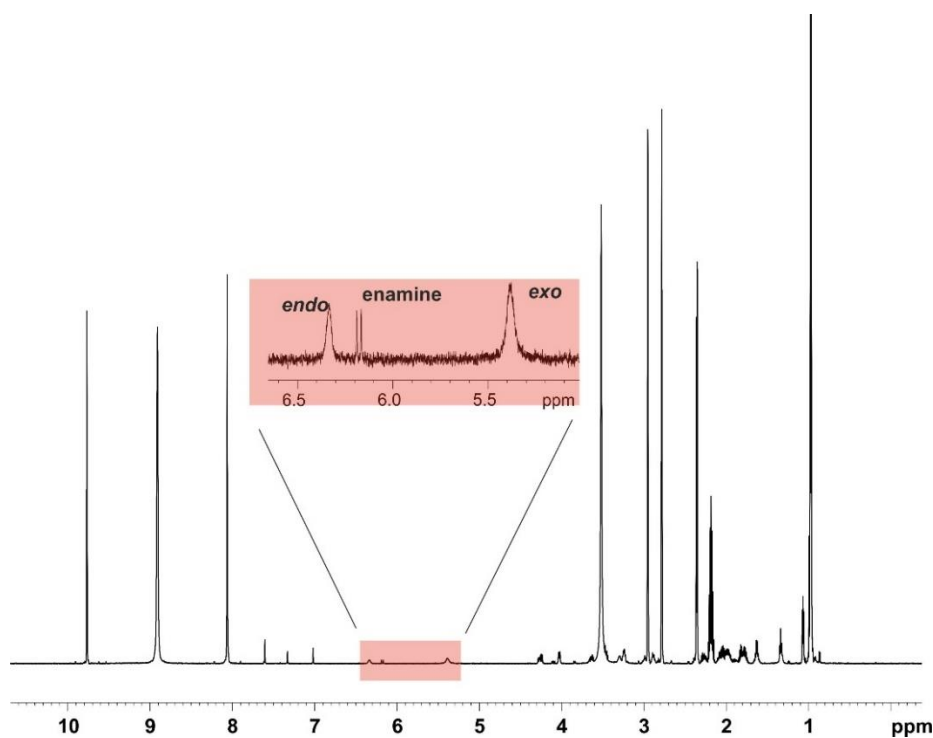

**S 3:** 1D <sup>1</sup>H spectrum of the reaction mixture of L-proline (1 equiv.) and 3-methylbutanal (1 equiv.) in DMF-d<sub>7</sub> at 300 K in presence of DPU-d<sub>10</sub> (1 equivalent). The highlighted region shows the corresponding H<sub>1</sub> protons of all detectable intermediates, *exo*-, *endo*-oxazolidinone and enamine.

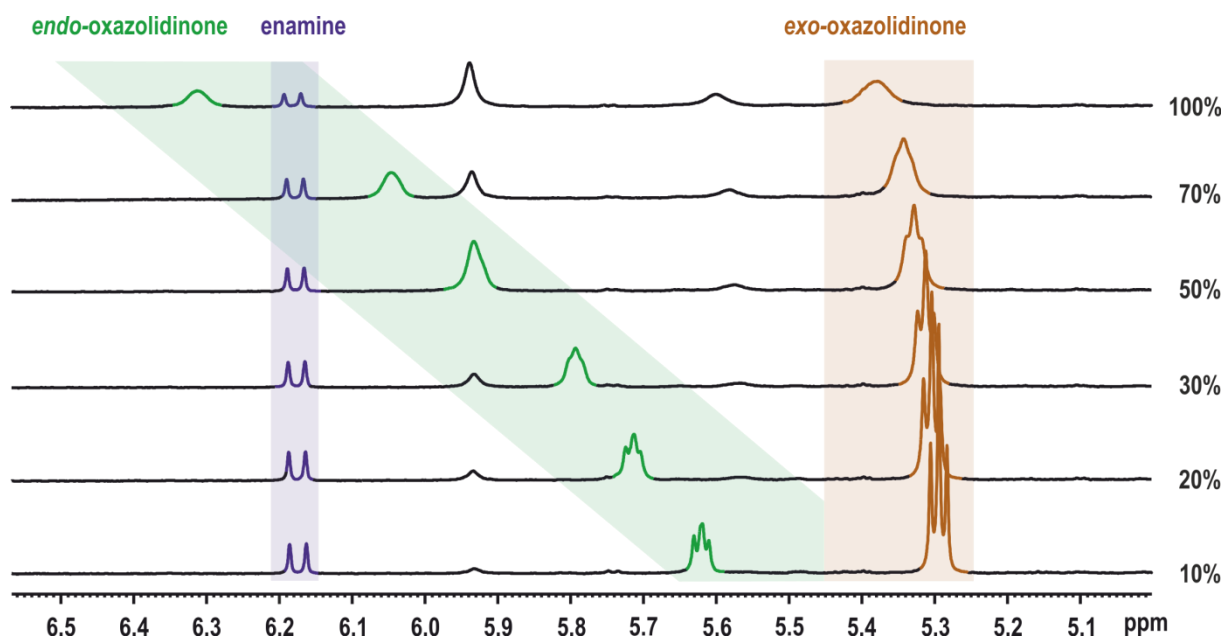

**S 4:** DPU concentration dependent shift for the H<sub>1</sub> protons of *endo*-, *exo*-oxazolidinone and enamine in a reaction mixture of L-proline (1 equiv.), 3-methylbutanal (1 equiv.) and the indicated amount of DPU (10-100%; 100% = 1 equiv.) in DMF-d<sub>7</sub> at 300 K.

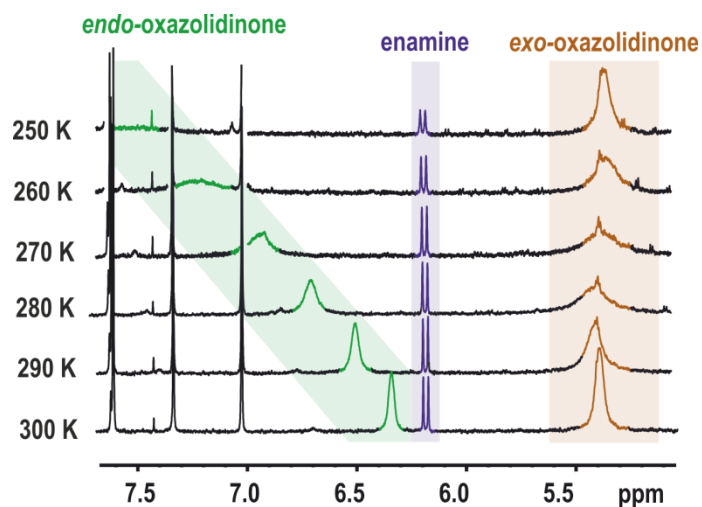

**S 5:** Temperature dependent shift for the H<sub>1</sub> protons of *endo*-, *exo*-oxazolidinone and enamine in a reaction mixture of L-proline (1 equiv.), 3-methylbutanal (1 equiv.) and DPU (1 equiv.) in DMF-d<sub>7</sub> at 300-250 K. The continued line broadening and downfield shift for H<sub>1</sub> of *endo* indicates fast exchange regime for *endo*-oxazolidinone ↔ *E*-Iminium and narrower-broader-narrower profile for H<sub>1</sub> of *exo* shows shifting from fast exchange to slow exchange regime for *exo*-oxazolidinone ↔ *Z*-Iminium.

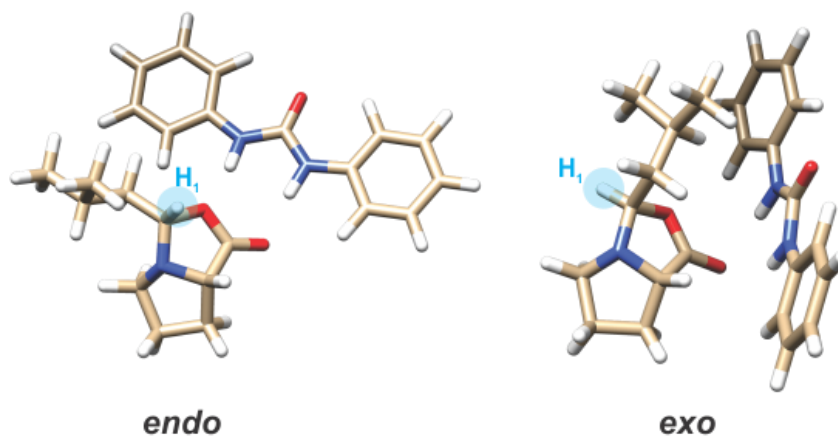

**S 6:** Most stable calculated structures of *endo*- and *exo*-oxazolidinone in complexation with DPU. The calculations did not reveal any deshielding effect of the aryl moieties of the DPU on the  $H_1$  protons of *endo*- or *exo*-oxazolidinone. However the calculations (see Charge and Bond Length Analysis) showed a  $C_1$ -O bond elongation causing a shift of  $H_1$ . The shift of  $H_1$  is more pronounced in *endo*-oxazolidinone.

## 6. Charge and bond length analysis

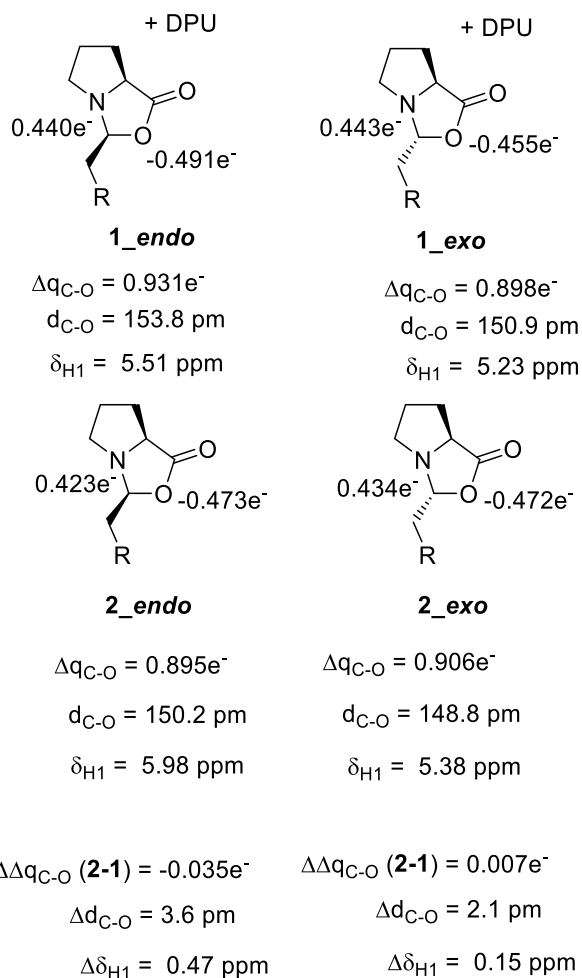

**S 7:** Calculated NBO charges for *exo*- and *endo*-oxazolidinone along the C<sub>1</sub>-O bond with and without DPU. The resulting bond elongation is translated to change in chemical shift for the H<sub>1</sub> protons, explaining the stronger shift in case of H<sub>1</sub> of *endo*-oxazolidinone (see manuscript).

## 7. Effect of temperature on *E*-Iminium population in presence of DPU (1 equivalent).

Possible reasons for the shift of the H<sub>1</sub> signal of *endo*-oxazolidinone at 300 K in presence of DPU, shown above (S4), were discussed in detail in the manuscript. Decrease in temperature enhanced *E*-iminium ion population causing continued downfield shift for H<sub>1</sub> of *endo*-oxazolidinone peak. For *Z*-iminium ion and *exo*-oxazolidinone quantitative data regarding exchange rates and thermal population were obtained directly from CEST (see manuscript). Unlike the *Z*-iminium ion, it is not possible to analyze the kinetic and thermodynamics by CEST due to the fast exchange ( $k \geq \Delta\nu$ ) between *E*-iminium ion and *endo*-oxazolidinone. At 300 K, the EXSY measurements (data shown below) showed similar exchange rates for interconversion between *exo*↔*endo*, indicating equivalent thermal stability for *E*- and *Z*-iminium ion. The CEST measurement showed that *Z*-iminium ion is located +8.1 kJ/mol above the *exo*-oxazolidinone at 250 K, and is expected to be even higher at room temperature. Due to the similar thermal stability of *E*/*Z*-iminium, the *E*-iminium ion is located at least +6.1 kJ/mol above the *endo*-oxazolidinone (considering the  $\Delta G_{300}$  of 2.0 kJ/mol between *exo* and *endo*). This means, the population effect of iminium species at 300 K is negligible.

The decrease of temperature results a continuous shift for the *endo* peak, which allows us to extract the population of *E*-iminium ion. However, the downfield due to the C<sub>1</sub>-O bond polarization must be discounted for all measurements at all temperature. The obtained relative population plots are shown below.

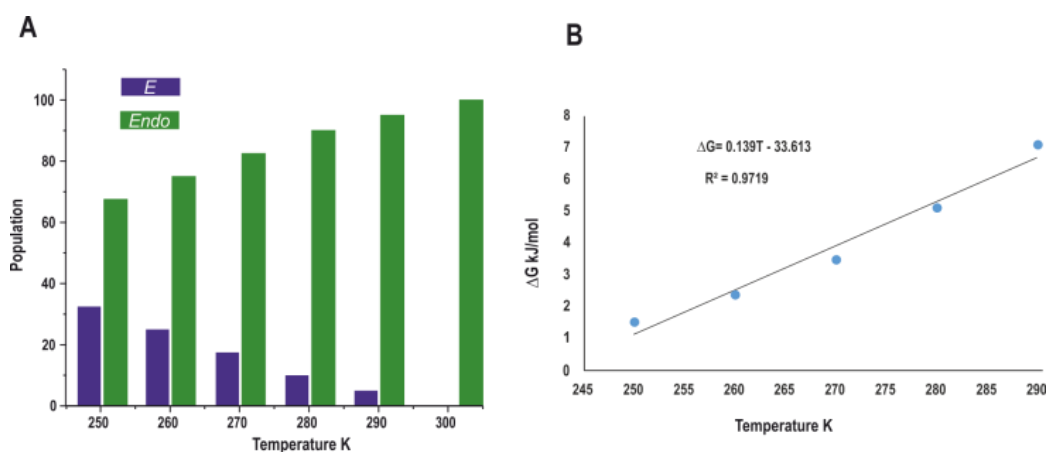

**S 8:** Plot of [*E*-iminium]/[*endo*-oxazolidinone] population dependency on temperature (A); Variation of difference in free energy between *endo*-oxazolidinone and *E*-iminium structure with temperature, the  $-\Delta S$  suggest more ordered structure for *E*-iminium:DPU than *endo*-oxazolidinone:DPU (B).

Upon decreasing temperature to 250 K, the energy gap diminishes, and the interconversion process enters towards slow exchange regime (broadening of signals). Furthermore, the plot  $\Delta G_{E/endo}$  vs. temperature yields a negative  $\Delta S$  (-139 J/(mol K)), which implicates a more ordered state of *E*-iminium relative to *endo*-oxazolidinone in presence of DPU. This is rather surprising because it is usually assumed that the oxazolidinone is more rigid than the iminium. The more ordered state at *E*-iminium side would mean that DPU associates stronger with the zwitterionic species than the neutral oxazolidinone.

## 8. 1D <sup>1</sup>H EXSY studies to obtain rate constants and free energy barriers at 300 K

A series of 1D <sup>1</sup>H EXSY experiments were measured by exciting <sup>1</sup>H protons of *exo*-, *endo*-oxazolidinone and enamine for different mixing time. The plot of intensity versus mixing time directly provides rate exchange from the slope, which can be used to extract rate constant and hence the free energy barrier.

### *exo*-oxazolidinone → *endo*-oxazolidinone

The Intensity  $I_0$  (*exo*) is relative intensity of <sup>1</sup>H proton of *exo*-oxazolidinone at 0 s

By Eyring equation  $k = \frac{k_B T}{h} e^{\frac{-\Delta G^\ddagger}{RT}}$

For  $k = 1.26 \text{ s}^{-1}$  the free energy barrier for *exo*→*endo* is  $\Delta G^\ddagger = 72.9 \text{ kJ/mol}$

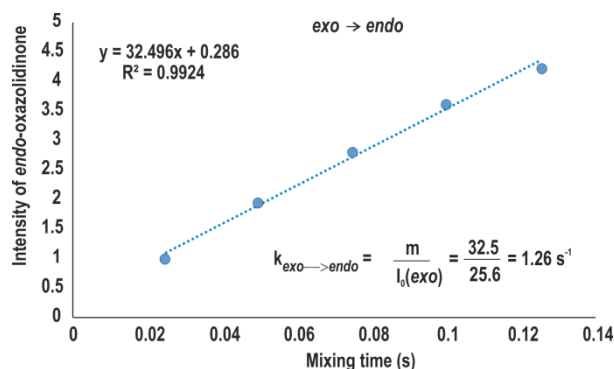

**S 9:** 1D selective EXSY build-up curve for *exo*→*endo* exchange. The dashed line represents the initial slope, which is used for rate approximation.

### *endo*-oxazolidinone → *exo*-oxazolidinone

The Intensity  $I_0$  (*endo*) is relative intensity of <sup>1</sup>H proton of *endo*-oxazolidinone at 0 s

By Eyring equation,  $k = \frac{k_B T}{h} e^{\frac{-\Delta G^\ddagger}{RT}}$

For rate constant  $k = 1.5 \text{ s}^{-1}$  the free energy barrier for *endo*→*exo* is  $\Delta G^\ddagger = 72.5 \text{ kJ/mol}$ . The values suggests similar thermal stability for *E* and *Z*-iminium, since C=N rotation is the rate measurement step

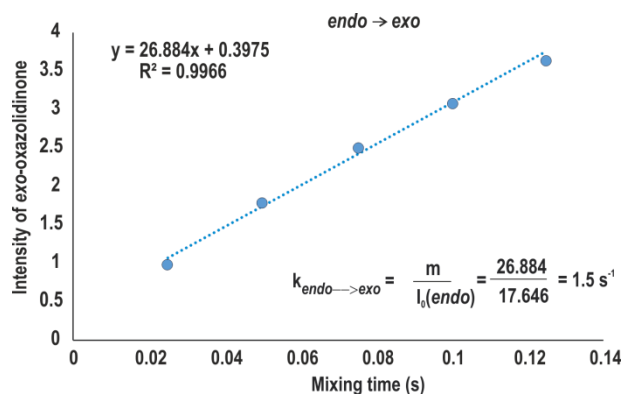

**S 10:** 1D selective EXSY build-up curve for *endo*→*exo* exchange. The dashed line represents the initial slope, which is used for rate approximation.

### *exo*-oxazolidinone → enamine

The Intensity  $I_0$  (enamine) is relative intensity of <sup>1</sup>H proton of enamine at 0 s

By Eyring equation  $k = \frac{k_B T}{h} e^{\frac{-\Delta G^\ddagger}{RT}}$

For rate constant  $k = 0.113 \text{ s}^{-1}$  the free energy barrier for *exo*→enamine is  $\Delta G^\ddagger = 79 \text{ kJ/mol}$

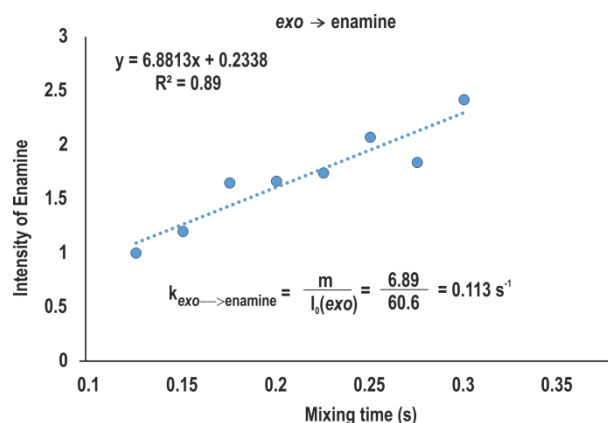

**S 11:** 1D selective EXSY build-up curve for *exo*→enamine exchange. The dashed line represents the initial slope, which is used for rate approximation.



### *endo*-oxazolidinone → enamine

Due to near frequency separation between H<sub>1</sub> of *endo* and enamine, the quantitative EXSY data was not possible. In *endo/exo*-oxazolidinone to enamine conversion, the rate determining step is conversion from *E/Z*-iminium to enamine. At 300 K, the thermal stability of *E* and *Z* are similar, assuming similar free energy barrier for both *E*-iminium to enamine and *Z*-iminium to enamine. The derived *endo*-oxazolidinone to enamine free energy barrier is 78.6 kJ/mol.

## 9. <sup>1</sup>H CEST pulse sequence

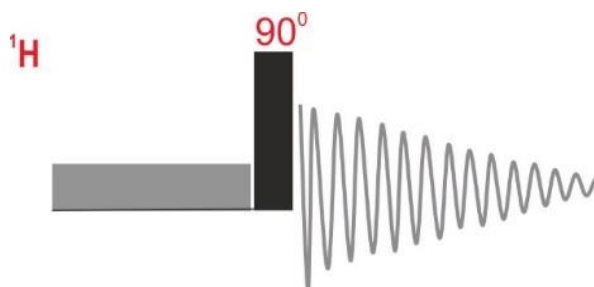

**S 12:** CEST pulse sequence

Graphical representation of applied CEST pulse sequence consists of initial continuous saturation pulse, followed by a 90° pulse. In all our experiments the saturation is applied for 0.75 s with B<sub>1</sub> ≈ 45 Hz RF strength. Acquisition time Aq = 1 s, and inter scan delay time d1 = 3 s are used.

The saturation offset scanned with incremental step of 50 Hz, from up field to down field, while monitoring H<sub>1</sub> peak intensity of *exo*-oxazolidinone. The data, intensity of marked H<sub>1</sub> peak in *exo*-oxazolidinone vs. saturation offset (CEST profile) was plotted for further analysis

## 10. Possible intermediate probes to detect iminium ion in the system

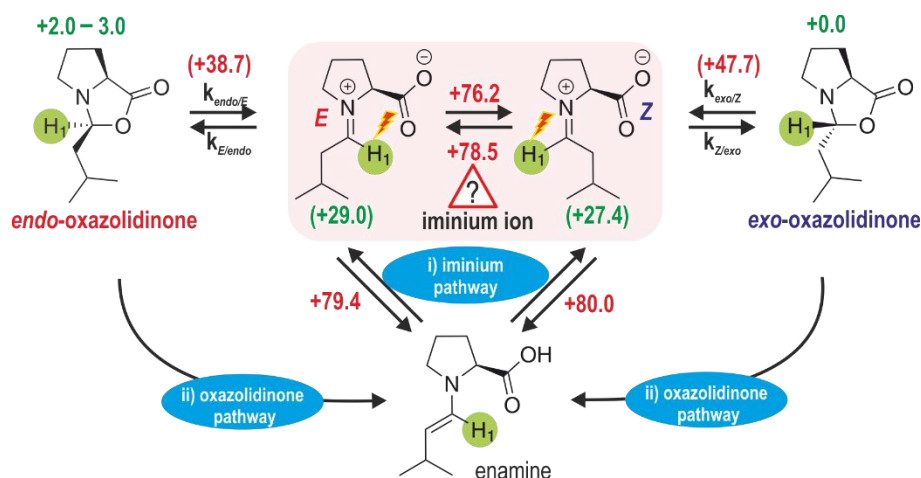

S 13: possible equilibria in the reaction system between the intermediates

In principle it is possible to observe the decreased intensity in CEST on saturation of  $H_1$  proton of iminium ion ( $\approx 9$  ppm) in all three intermediates *exo*-, *endo*-oxazolidinone and enamine. Since all these three intermediates exchanges with iminium ion as shown in figure S13. However at room temperature due to very less concentration of iminium ion even in presence of DPU, it could not be detected in CEST. On decrease in temperature to stabilize iminium ion, the exchange of iminium ion with enamine freezes and iminium ion exchange happens only with oxazolidinones. Therefore at low temperature the saturation effect on iminium ion can be observed only in oxazolidinone. Further it was observed that at 250 K, the slow exchange regime is achieved only for *exo* ↔ Z-iminium ion, which is necessary condition in CEST experiment.

## 11. Bloch-McConnell equations for two site exchange

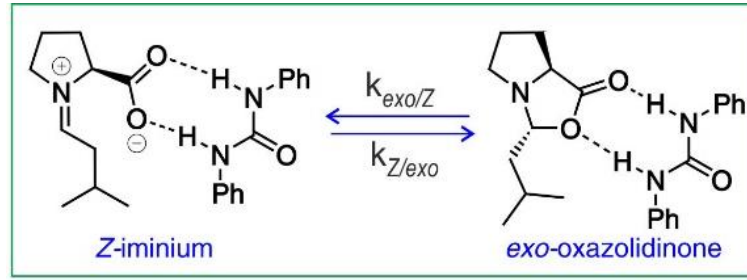

**S 14:** Two side exchange equilibrium between Z-iminium ion and *exo*-oxazolidinone.

For our two site exchange system, here between *exo*-oxazolidinone and Z-iminium ion, the equations are

$$\frac{dM_x^{exo}}{dt} = -\Omega_{exo}M_y^{exo} - R_2^{exo}M_x^{exo} - k_{exo \rightarrow Z}M_x^{exo} + k_{Z \rightarrow exo}M_x^{im} \quad [1]$$

$$\frac{dM_x^{im}}{dt} = -\Omega_{im}M_y^{im} - R_2^{im}M_x^{im} - k_{Z \rightarrow exo}M_x^{im} + k_{exo \rightarrow Z}M_x^{exo} \quad [2]$$

$$\frac{dM_y^{exo}}{dt} = -\Omega_{exo}M_x^{exo} - R_2^{exo}M_y^{exo} - k_{exo \rightarrow Z}M_y^{exo} + k_{Z \rightarrow exo}M_y^{im} - \omega_1M_z^{exo} \quad [3]$$

$$\frac{dM_y^{im}}{dt} = -\Omega_{im}M_x^{im} - R_2^{im}M_y^{exo} - k_{Z \rightarrow exo}M_y^{im} + k_{exo \rightarrow Z}M_y^{exo} - \omega_1M_z^{exo} \quad [4]$$

$$\frac{dM_z^{exo}}{dt} = -R_1^{exo}(M_z^{exo} - M_0^{exo}) - k_{exo \rightarrow Z}M_z^{exo} + k_{Z \rightarrow exo}M_z^{im} + \omega_1M_y^{exo} \quad [5]$$

$$\frac{dM_z^{im}}{dt} = -R_1^{im}(M_z^{im} - M_0^{im}) - k_{Z \rightarrow exo}M_z^{im} + k_{exo \rightarrow Z}M_z^{exo} + \omega_1M_y^{im} \quad [6]$$

Here,

$M_{x,y,z}^{exo}$  and  $M_{x,y,z}^{im}$  are magnetization of *exo*-oxazolidinone and iminium ion.

$k_{Z \rightarrow exo}$  and  $k_{exo \rightarrow Z}$  are rate constants .

$\Omega_{im}$  = offset frequency of iminium proton (H<sub>1</sub>)

$\Omega_{exo}$  = offset frequency of *exo*-oxazolidinone proton (H<sub>1</sub>)

$$R_2^{exo} = \frac{1}{T_{2exo}}, R_2^{im} = \frac{1}{T_{2im}}, R_1^{exo} = \frac{1}{T_{1exo}} \text{ and } R_1^{im} = \frac{1}{T_{1im}}$$

$T_{2exo}$  and  $T_{2im}$  are spin-spin relaxation times for H<sub>1</sub> proton of *exo*-oxazolidinone and iminium ion.

$T_{1exo}$  and  $T_{1im}$  are spin-lattice relaxation times for H<sub>1</sub> proton of *exo*-oxazolidinone and iminium ion.

## 12. CEST spectra (profile) simulation details

CEST spectra are simulated using numerical solutions of above Bloch-McConnell equations. Simulations are carried out in MATLAB as described in earlier reports.<sup>1-3</sup> The used initial input parameters are  $M_{0exo}$ ,  $M_{0imi}$ ,  $\omega_1$ ,  $T_{1exo}$ ,  $T_{1imi}$  and  $k_{Z/exo}$ .

Here,

$M_{0exo}$ , is initial magnetization of *exo* oxazolidinone at equilibrium;

$M_{0imi}$ , is initial magnetization of Z-Iminium ion at equilibrium;

$\omega_1$  is strength of RF saturation in Hz ;

$T_{1exo}$  and  $T_{1imi}$  are longitudinal relaxations of chosen proton in *exo*-oxazolidinone and Z-iminium ion respectively;

$k_{Z/exo}$  is rate of ring closing from Z-iminium to *exo*-oxazolidinone.

In all simulated spectra, we used  $M_{0exo} = 1$  and  $\omega_1 = 45$  Hz. The  $T_{1exo}$  values are experimentally obtained by inversion recovery experiment while saturating at 9.12 ppm.  $M_{0imi}$  and  $k_{Z/exo}$  are varied to match simulation spectra with that of experimental data via multi parameter optimization.

Case 1. At 250 K:

$M_0(exo) = 1$ ,  $\omega_1 = 45$  Hz and  $T_{1exo} = T_{1im} = 1.8$  s are fixed.

Case 2. At 213 K:

$M_0(exo) = 1$ ,  $\omega_1 = 45$  Hz and  $T_{1exo} = T_{1im} = 0.8$  s are fixed.

### 13. Details of theoretical calculations

#### Extrapolation procedure

The total energy at DLPNO-CCSD(T)/CBS level of theory were extrapolated according to the extrapolation formula Eq. 1-4.

$$E_{SCF}^X = E_{SCF}^{\infty} + Ae^{-a\sqrt{X}} \quad \text{Eq. 1}$$

$$E_{corr,MP2}^{\infty} = \frac{X^{\beta} E_{corr,MP2}^X - (X-1)^{\beta} E_{corr,MP2}^{X-1}}{X^{\beta} - (X-1)^{\beta}} \quad \text{Eq. 2}$$

$$E_{MP2}^{\infty} = E_{SCF}^{\infty} + E_{corr,MP2}^{\infty} \quad \text{Eq. 3}$$

$$E_{CCSD(T)}^{\infty} = E_{CCSD(T)}^{def2-TZVPP} + E_{MP2}^{\infty} - E_{MP2}^{def2-TZVPP} \quad \text{Eq. 4}$$

$\Delta G_{268}$  CCSD(T)/CBS (Boltzmann averaged) +  $\Delta G_{solv}$  (CPCM) in a.u.

| Ground states                    |              |
|----------------------------------|--------------|
| <i>exo</i> -oxazolidinone        | -1282.024904 |
| <i>endo</i> -oxazolidinone       | -1282.023829 |
| <i>Z</i> -iminium                | -1282.022150 |
| <i>E</i> -iminium                | -1282.022783 |
| Transition states (Ring Opening) |              |
| <i>exo</i> -oxazolidinone        | -1282.006070 |
| <i>endo</i> -oxazolidinone       | -1282.010202 |

#### Geometry of stationary points (most stable conformations)

##### *exo*-oxazolidinone + DPU

```
1\1\GINC-WORKER1\FOpt\RTPSSTPSS\def2SVP\W06\C23H29N3O3\JHIOE\09-May-20
17\0\#p tpsstps/def2svp/w06 empiricaldispersion=gd3 scrf=(cpcm,solve
nt=n,n-DiMethylFormamide,read) opt int=ultrafine\title\0,1\C,-1.8931
520135,1.9076239109,-0.3230357501\C,-1.6467014096,4.2107435123,0.19111
26099\C,-3.0520489729,4.0445277726,-0.3912125564\H,-2.301196548,0.9891
057102,0.1397425265\H,-1.5920048449,4.93159841,1.0233454106\H,-0.93407
18413,4.5349658706,-0.5990810733\H,-3.7895229206,3.9922810108,0.428483
1942\H,-3.3347971572,4.8733515737,-1.0597245779\C,0.0487240683,2.49952
```

69207,0.8140310867\N,-1.345341637,2.8430183047,0.6823200963\O,0.445130  
8612,1.931027115,-0.5266256479\C,-0.6624100671,1.5012013627,-1.1384848  
142\O,-0.6293939681,0.8542057589,-2.1815149904\C,0.3218568015,1.429059  
5633,1.869058646\H,0.0760835776,1.8808071035,2.8487488111\C,1.75795745  
58,0.8646757994,1.8811427304\H,1.9690588203,0.487420029,0.8652044228\H  
,-0.3973260467,0.6029878368,1.7140006903\C,-2.9697974335,2.6864756844,  
-1.1229460401\H,-3.9289733732,2.1472870025,-1.1398394907\H,-2.64039601  
06,2.8154160969,-2.1676807983\C,2.8118169693,1.9349831698,2.2122953414  
\H,2.8167952666,2.7553684934,1.4726239955\H,2.6302814866,2.3766923893,  
3.2102575344\H,3.8231962226,1.4910763507,2.215844592\C,1.8475621164,-0  
.3290137676,2.8462645833\H,1.1514285266,-1.1313587469,2.5454435761\H,2  
.8672675469,-0.7534757159,2.8456995949\H,1.6047121364,-0.0236084177,3.  
8815567156\C,0.3318339449,-2.0073736662,-0.5114078731\O,0.6535778664,-  
2.8075351938,0.3711909234\N,-0.9809467808,-1.7581129527,-0.8977977476\  
H,-1.1090521202,-1.0517052617,-1.6279187432\N,1.2308662255,-1.24094844  
11,-1.2435746847\H,0.8186144361,-0.5196263554,-1.8478480539\C,2.617822  
6997,-1.1196610841,-1.0473264285\C,3.2579816615,-0.0103354934,-1.64939  
58292\C,3.3871803482,-2.0270815911,-0.2850215422\C,4.6326747261,0.1902  
603821,-1.487043576\H,2.6610365755,0.704399133,-2.2262794995\C,4.76360  
75982,-1.8076534784,-0.1284816355\H,2.8979608263,-2.8784051806,0.18792  
75585\C,5.398185861,-0.7051698631,-0.7212558663\H,5.1062810863,1.05884  
97882,-1.9575975523\H,5.3463991647,-2.5169422089,0.4699404098\H,6.4732  
981917,-0.5450907315,-0.5898496741\C,-2.1712586723,-2.2071613063,-0.30  
11788121\C,-3.38097299,-1.6547231738,-0.7883946995\C,-2.2230058882,-3.  
1582834981,0.743255168\C,-4.6098717021,-2.0386509177,-0.2410184218\H,-  
3.3493129561,-0.9200154059,-1.6015025671\C,-3.4641899697,-3.5296544698  
,1.280839416\H,-1.295238079,-3.5898444045,1.1188465802\C,-4.6626151803  
,-2.9789096843,0.8013039585\H,-5.5317781549,-1.5960810946,-0.633754295  
7\H,-3.4878771239,-4.267005533,2.0911668909\H,-5.6240328451,-3.2786870  
6,1.2307751164\H,0.6731146383,3.3947546426,0.949821062\Version=ES64L-  
G09RevD.01\State=1-A\HF=-1283.2813331\RMSD=5.862e-09\RMSF=5.445e-06\Di  
pole=-1.2930581,3.0343326,0.0427922\Quadrupole=5.2194012,0.5990893,-5.  
8184905,-2.1630566,2.8182429,-1.81857\PG=C01 [X(C23H29N3O3)]\@

**endo-oxazolidinone + DPU**

1\1\GINC-LOGIN\FOpt\RTPSSTPSS\def2SVP/W06\C23H29N3O3\ROOT\09-May-2017\  
0\#p tpsstps/def2svp/w06 empiricaldispersion=gd3 scrf=(cpcm,solvent=  
n,n-DimethylFormamide,read) opt int=ultrafine\title\0,1\C,1.45388161

83,-3.0315153584,0.2390818279\C,3.3463521724,-2.1535086269,1.339562582  
2\C,3.1025692677,-3.5341685474,1.9554293038\H,1.1634017382,-3.63353683  
14,-0.6426277988\H,4.4124227251,-1.8967277512,1.2387984942\H,2.8540910  
054,-1.3658007814,1.9504888015\H,3.8138454697,-4.260015475,1.525351314  
4\H,3.2291068245,-3.5330610132,3.0496264078\C,2.3178326125,-1.11524645  
96,-0.6949415884\N,2.717348006,-2.2988987854,0.0009054616\O,0.94964755  
04,-0.7592635581,-0.0902054299\C,0.4237340617,-1.8997880938,0.38230526  
93\O,-0.7048502503,-1.9588062497,0.849291508\C,3.2214712848,0.09704328  
08,-0.6081321064\H,2.6984051067,0.9361286706,-1.1009758779\C,4.6087905  
046,-0.0993806008,-1.2637609705\H,5.1072185003,-0.9477688803,-0.756222  
8482\H,3.3479902469,0.376479168,0.4523385859\C,1.6587917607,-3.8781927  
847,1.5178582705\H,1.5223729256,-4.9516156368,1.3190419035\H,0.9196063  
206,-3.5826837843,2.280997662\C,4.510602859,-0.4377524394,-2.761804062  
5\H,3.9985058403,-1.4002242987,-2.9361258625\H,3.958573964,0.349589675  
7,-3.3083260102\H,5.5186075249,-0.5146642667,-3.2057764828\C,5.4617198  
075,1.1600177699,-1.0332174078\H,5.563471822,1.3833965459,0.0438457513  
\H,6.4743456078,1.0314378995,-1.4541796372\H,4.9998863925,2.0395179256  
,-1.5194634657\C,-2.372490514,1.35923812,0.0245016125\O,-3.183301147,2  
.2650812381,-0.1953696034\N,-2.6925113943,0.0105315751,0.0641289712\H,  
-1.9544437234,-0.6425193497,0.3734197145\N,-1.0198166211,1.5729113199,  
0.2679836104\H,-0.4161742038,0.7470710662,0.3230170335\C,-0.3424660024  
,2.7953981047,0.4111696461\C,1.0041602625,2.734600878,0.8447890926\C,-  
0.917305421,4.0600085069,0.1453839362\C,1.761610049,3.9010762239,0.992  
1500044\H,1.4472975608,1.7595907533,1.0697825853\C,-0.1462783972,5.220  
7056928,0.3084322246\H,-1.9544271155,4.1157038557,-0.1854311227\C,1.19  
23537946,5.1576274359,0.7255506438\H,2.8032187578,3.8236467461,1.32334  
80043\H,-0.6068472111,6.1926285604,0.0975977092\H,1.7827635215,6.07220  
86106,0.8431655959\C,-3.9274084271,-0.5968025676,-0.2161949641\C,-3.99  
48799442,-2.0060858216,-0.0804405372\C,-5.0847786371,0.1054729049,-0.6  
276175331\C,-5.1848620402,-2.6909004929,-0.3486149561\H,-3.100945274,-  
2.5538017317,0.2370822755\C,-6.268333155,-0.5990247246,-0.8935787258\H  
,-5.0427586912,1.1899417841,-0.7288200373\C,-6.3342668551,-1.994261220  
6,-0.7586519464\H,-5.2112478927,-3.7805489948,-0.2360435034\H,-7.15496  
0757,-0.0384649248,-1.2114761577\H,-7.2652943402,-2.5311353283,-0.9684  
021525\H,2.0600635488,-1.3648449327,-1.7377810149\\Version=ES64L-G09Re  
vD.01\State=1-A\HF=-1283.277155\RMSD=7.249e-09\RMSF=5.030e-06\Dipole=4  
.2797189,-2.4622704,0.1116238\Quadrupole=-2.0894392,3.244179,-1.154739  
8,2.1717863,3.4398831,-2.1816851\PG=C01 [X(C23H29N3O3)]\@

## Z-iminium + DPU

1\1\GINC-LOGIN\FOpt\RTPSSSTPSS\def2SVP\W06\C23H29N3O3\ROOT\09-May-2017\  
0\#p tpsstps\def2svp\w06 scrf=(cpcm,solvent=n,n-DiMethylFormamide,rea  
ad) empiricdispersion=gd3 opt int=ultrafine\title\0,1\C,-2.3260180  
861,-1.59324174,-0.8691349996\C,-3.9229533122,-0.6043165189,-2.4142404  
112\C,-3.7703378109,-2.0783081257,-2.7901326004\H,-2.527925009,-2.1805  
29862,0.0417350314\H,-4.9476469437,-0.2082594559,-2.4366952536\H,-3.26  
30898891,0.0429741568,-3.0189200003\H,-4.5963410882,-2.6609829028,-2.3  
466737406\H,-3.7854468108,-2.2264941341,-3.8808475116\C,-3.8257959832,  
0.2250585321,-0.0989363669\H,-4.604205196,0.9332970021,-0.4142158147\N  
,-3.4055566927,-0.5859086659,-1.0178670774\O,-0.9167528236,0.291705856  
8,-0.2908478671\C,-0.9269434316,-0.9088133549,-0.6681784381\O,0.051403  
0244,-1.66813525,-0.8840572503\C,-3.4217803866,0.2390546447,1.32916940  
86\H,-2.6203022658,-0.4848262498,1.5393054356\C,-4.642796221,0.0089715  
307,2.269298607\H,-5.4100319976,0.7666733108,2.0164535121\H,-3.0037024  
716,1.245335629,1.5224707147\C,-2.4209225505,-2.4573780524,-2.15005488  
74\H,-2.3465558115,-3.5293650871,-1.9160389141\H,-1.5826433541,-2.2033  
211269,-2.8187327111\C,-5.2515930252,-1.3882893655,2.0611424743\H,-5.5  
893934757,-1.5384337395,1.0195759216\H,-4.5127625125,-2.1767903068,2.2  
959483127\H,-6.123886477,-1.5332075808,2.7216620301\C,-4.213083703,0.2  
284054909,3.7285516018\H,-3.8115401719,1.2455642994,3.8804501401\H,-5.  
0728725468,0.0919634878,4.4073815209\H,-3.430924499,-0.4964400382,4.01  
97380622\C,2.7728441691,0.7305387645,0.0672727597\O,3.8870096138,1.219  
1648011,0.3033132743\N,2.5195740506,-0.6319167424,-0.0092830332\H,1.57  
5171353,-0.9374003934,-0.3400768836\N,1.6247447786,1.478128412,-0.1533  
688976\H,0.7141443018,0.9671686466,-0.2135013139\C,1.5084142239,2.8722  
782803,-0.2336408352\C,0.2067923704,3.3956733468,-0.4506873213\C,2.592  
4805729,3.7773469748,-0.1224511928\C,-0.000620633,4.7754278243,-0.5492  
010086\H,-0.6326125966,2.6983049408,-0.5415315863\C,2.3642417715,5.157  
623966,-0.2262519956\H,3.5951797852,3.3851807924,0.0477736619\C,1.0758  
773753,5.6724528306,-0.4382052161\H,-1.016264065,5.1522242166,-0.71628  
18877\H,3.2170977289,5.8407635031,-0.1371642023\H,0.9120636202,6.75251  
23638,-0.5156198357\C,3.4073921826,-1.6863589862,0.2448630958\C,2.9067  
137697,-3.0026463336,0.0666065405\C,4.7481542178,-1.5233742721,0.67213  
97076\C,3.7210968336,-4.1143448487,0.305860425\H,1.8695405988,-3.13073  
87509,-0.2606486811\C,5.5482280606,-2.6511543899,0.9088847973\H,5.1432  
979729,-0.5165556747,0.8076186483\C,5.0513534222,-3.951456536,0.729896  
2608\H,3.3091112639,-5.1194849346,0.1596605416\H,6.5831022027,-2.50291  
45314,1.239129358\H,5.6878455771,-4.8228656538,0.9167108914\Version=E



S64L-G09RevD.01\State=1-A\HF=-1283.2799569\RMSD=4.595e-09\RMSF=2.408e-06\Dipole=-8.8073483,-1.2745358,-0.8234744\Quadrupole=14.2329333,-12.0585813,-2.174352,1.2655675,6.7214813,2.1674415\PG=C01 [X(C23H29N3O3)]\

### ***E*-iminium + DPU**

1\1\GINC-LOGIN\FOpt\RTPSS\def2SVP\W06\C23H29N3O3\ROOT\15-May-2017\0\#p tpsstpss/def2svp/w06 scrf=(cpcm,solvent=n,n-DiMethylFormamide,read) empiricdispersion=gd3 opt int=ultrafine\title\0,1\C,-1.6794133038,-2.1765674288,-0.6773847147\C,-3.8331286825,-1.6322643894,-1.7307470518\C,-3.236839848,-2.8695251536,-2.408290754\H,-1.6264268756,-2.9845488408,0.072082728\H,-4.889250092,-1.7326442303,-1.4442241286\H,-3.7045222072,-0.7217490054,-2.3424846729\H,-3.6486457165,-3.7831468646,-1.9456219212\H,-3.4663647568,-2.8919273253,-3.4847621258\C,-3.2891007314,-0.8019331636,0.5473393227\H,-2.5591061814,-0.8421434894,1.3635003042\N,-2.9887583402,-1.4861957123,-0.5114303377\O,-0.6736810448,-0.0806622213,0.0461702317\C,-0.461527757,-1.2283338214,-0.4308946805\O,0.6420407512,-1.7424773756,-0.7493414598\C,-4.5346416951,-0.0095059257,0.7337665337\H,-4.9948176463,0.2444110386,-0.2366728628\C,-4.3032733453,1.2715163625,1.577548752\H,-3.8789157739,0.9519555471,2.5496020557\H,-5.250473756,-0.6701104226,1.2671084625\C,-1.7345324979,-2.739822096,-2.112656316\H,-1.189327164,-3.691316263,-2.1888554476\H,-1.264838876,-2.0236494703,-2.80855341\C,-3.292011796,2.2062753137,0.8932522284\H,-2.3255041506,1.6989680825,0.7319777365\H,-3.6693278431,2.5393587189,-0.0918173502\H,-3.1120190524,3.1050871029,1.5082784697\C,-5.6443915193,1.97140977,1.8450881057\H,-6.3519905164,1.3037489086,2.3678071004\H,-5.4925203986,2.8687549385,2.4697263335\H,-6.114333429,2.2936970691,0.8975507396\C,2.8506345736,1.1173466048,0.0648730995\O,3.8520253889,1.8301041269,0.2202420976\N,2.8506432276,-0.267166529,0.1525789317\H,1.9940098137,-0.7689104427,-0.1815431257\N,1.5824351317,1.6023239086,-0.2247667558\H,0.7855967994,0.9315618647,-0.1520868835\C,1.2113688029,2.9168378515,-0.536479513\C,-0.1371014181,3.1251679783,-0.9243712948\C,2.0843604153,4.0309203846,-0.492414958\C,-0.6006858319,4.405972944,-1.2411915699\H,-0.8097989164,2.2629841418,-0.9717654908\C,1.6038706232,5.3070549554,-0.8230570806\H,3.1224997149,3.8796854153,-0.1956565455\C,0.2658110079,5.5119223409,-1.1945217382\H,-1.6495072112,4.5373460752,-1.531198557\H,2.2948445134,6.1572190431,-0.782246694\H,-0.0962558855,6.5147406916,-1.444637854\C,3.9042657173,-1.1067183078,0.5354071303\C,3.6568433849

,-2.5036922347,0.4954281322\C,5.1758517798,-0.6546827761,0.9653558911\  
C,4.6491068102,-3.4148725347,0.8716331681\H,2.6733275157,-2.8538833692  
,0.1635566313\C,6.157080949,-1.5841426456,1.3411749841\H,5.3777100041,  
0.4163731822,0.9918418871\C,5.9104682597,-2.9652630721,1.2993367684\H,  
4.4322382711,-4.4884775288,0.8305099015\H,7.134919179,-1.2141172054,1.  
6711064966\H,6.6865388357,-3.6797618255,1.5935186905\\Version=ES64L-G0  
9RevD.01\State=1-A\HF=-1283.282459\RMSD=7.265e-09\RMSF=3.081e-06\Dipol  
e=-8.4933168,-2.798089,-0.466351\Quadrupole=11.8350709,-5.3651327,-6.4  
699382,11.0489552,2.782214,3.3642656\PG=C01 [X(C23H29N3O3)]\@

### TS Ring Opening *endo*-oxazolidinone + DPU

1\1\GINC-WORKER0\FTS\RTPSS\TPSS\def2SVP/W06\C23H29N3O3\JHIOE\18-May-201  
7\0\#p tpsstps/def2svp/w06 empiricdispersion=gd3 scrf=(cpcm,solven  
t=n,n-DiMethylFormamide,read) opt=(ts,calcf, noeigen) int=ultrafine\|t  
itle\0,1\C,-1.3927084451,-2.943102568,-0.1378541067\C,-3.2766330622,-  
2.1916244499,-1.4130789051\C,-2.8871087419,-3.565421572,-1.9688124287\  
H,-1.1959483855,-3.5309910499,0.7763862787\H,-4.3624369913,-2.02547861  
96,-1.350425941\H,-2.8230906497,-1.3725842823,-2.006384347\H,-3.577980  
0829,-4.3298658573,-1.573791313\H,-2.934168427,-3.5945599871,-3.068507  
6497\C,-2.5768733853,-1.1584649721,0.7506559706\N,-2.6846334664,-2.237  
4451303,-0.0545288293\O,-0.8172012806,-0.6439688787,0.1974312436\C,-0.  
3433005819,-1.7888581318,-0.1896928889\O,0.8194989138,-1.9884298503,-0.  
.5726520124\C,-3.473945366,0.0305491803,0.6136182401\H,-3.0076090301,0.  
.8646083608,1.165538438\C,-4.9083948065,-0.2069091242,1.1705225558\H,-  
5.3553867977,-1.0437124033,0.5999681892\H,-3.5367612502,0.3251824757,-  
0.4475147051\C,-1.4586899297,-3.8015315468,-1.4220629376\H,-1.26295907  
54,-4.863842986,-1.213598869\H,-0.6895215645,-3.4520949171,-2.13028422  
37\C,-4.8999996618,-0.5929162094,2.6594177455\H,-4.375537644,-1.548281  
7223,2.8365745474\H,-4.4052242718,0.1883667651,3.2656047123\H,-5.93312  
88802,-0.7071328618,3.0309958517\C,-5.7581587341,1.0497778726,0.920137  
1482\H,-5.7886554774,1.3068071203,-0.1534488309\H,-6.7948580085,0.8917  
281996,1.2653733966\H,-5.3444480002,1.9170596756,1.4670797204\C,2.4350  
828116,1.3746212812,-0.0478010765\O,3.2596477526,2.2932383552,0.033193  
2989\N,2.7555262918,0.0262317732,-0.0024836033\H,2.0016632155,-0.65558  
71001,-0.2216195824\N,1.067449695,1.5717627436,-0.199918264\H,0.454744  
582,0.7459296079,-0.1178644238\C,0.3810376549,2.7808348024,-0.39059554  
16\C,-1.0116890771,2.6914389149,-0.6370730768\C,0.9837358033,4.0606072  
353,-0.3521456169\C,-1.7817301834,3.8435118676,-0.8246791745\H,-1.4766

712084,1.7023933556,-0.6830691597\C,0.1973265428,5.2055204165,-0.55102  
61288\H,2.0545369372,4.1397540716,-0.1643462856\C,-1.1838222601,5.1146  
410164,-0.7839404345\H,-2.8574997481,3.7428014137,-1.0083449921\H,0.68  
1089094,6.1885552045,-0.5172574351\H,-1.7845607221,6.0179968061,-0.932  
6471351\C,4.0108275817,-0.554403059,0.234443222\C,4.0809253493,-1.9703  
964802,0.1920981769\C,5.1890878579,0.176778164,0.5193823274\C,5.291196  
311,-2.6312880392,0.4271346675\H,3.1710645694,-2.5392330527,-0.0270534  
541\C,6.3928494697,-0.5042345173,0.7541596549\H,5.1461248933,1.2655747  
292,0.5477018192\C,6.4605475627,-1.9053218273,0.7112107474\H,5.3182373  
766,-3.7261739675,0.3881073584\H,7.2943657316,0.079615334,0.973361014\  
H,7.4074102461,-2.4238691296,0.8949287943\H,-2.1959560468,-1.380192449  
9,1.7539522539\Version=ES64L-G09RevD.01\State=1-A\HF=-1283.2728014\RM  
SD=4.182e-09\RMSF=8.548e-07\Dipole=-5.8084804,-2.9534151,0.0952037\Qua  
drupole=1.8203083,0.8853617,-2.70567,2.2093804,2.0196214,2.00474\PG=C0  
1 [X(C23H29N3O3)]\@

#### TS Ring Opening *exo*-oxazolidinone + DPU

1\1\GINC-WORKER1\FTS\RTPSS\TPSS\def2SVP/W06\C23H29N3O3\JHIOE\17-May-201  
7\0\#p tpsstps/def2svp/w06 empiricaldispersion=gd3 scrf=(cpcm,solven  
t=n,n-DiMethylFormamide,read) opt=(ts,calcfc,noeigen) int=ultrafine\|t  
itle\0,1\C,-1.7703659025,-2.6077078276,0.2076097901\C,-3.145608726,-2  
.7976143297,-1.7540896439\C,-2.8368347734,-4.2233381545,-1.2911684756\  
H,-1.9082606443,-2.5783292918,1.3008931271\H,-4.1791738769,-2.64457664  
63,-2.0989049517\H,-2.4451203006,-2.4640270181,-2.5444209907\H,-3.7029  
671413,-4.6267687517,-0.7387652551\H,-2.6224867203,-4.896635724,-2.135  
6126102\C,-2.9109137369,-0.6777055769,-0.502345587\N,-2.9107675283,-2.  
0171422581,-0.5137618688\O,-0.9089626324,-0.5645360594,-0.726936359\C,  
-0.5691685239,-1.6677677859,-0.1498210563\O,0.5906769363,-2.012923608,  
0.1346494929\C,-2.9705175476,0.1394709659,0.7540534309\H,-2.414588257,  
-0.3396379286,1.5773671901\C,-4.4406573219,0.4022946908,1.1973586462\H  
,-4.9979460625,0.7719739273,0.3137725156\H,-2.4821877939,1.1038914059,  
0.5390178526\C,-1.6293129682,-4.0491015826,-0.3412838676\H,-1.62262065  
82,-4.7938329318,0.4683802636\H,-0.6742897827,-4.1371080577,-0.8848647  
723\C,-5.1275899701,-0.8747966532,1.7077935358\H,-5.1341712557,-1.6705  
218575,0.9433722321\H,-4.6036649025,-1.2669291329,2.5993899596\H,-6.17  
30945804,-0.663844773,1.9932505105\C,-4.4536797465,1.5125178563,2.2628  
020172\H,-4.0040406137,2.4440164365,1.8758846651\H,-5.4879648397,1.733  
9595116,2.5795182594\H,-3.8827436329,1.2025611676,3.1574561742\C,2.353

6189937,1.3232192903,-0.1335346808\O,3.1873567491,2.2289761383,-0.0096  
264562\N,2.642674329,-0.0286037775,-0.022349497\H,1.8489115417,-0.7010  
39635,-0.0395778457\N,1.0097253753,1.5472790455,-0.4086348483\H,0.4068  
086883,0.7302340084,-0.6037339399\C,0.3528148921,2.7839421768,-0.50127  
37298\C,-0.9274696295,2.7954387823,-1.1092755285\C,0.8766314777,3.9988  
347334,0.001054213\C,-1.6696535202,3.9790594532,-1.1922573984\H,-1.328  
4556941,1.8638942112,-1.5208062058\C,0.1240990052,5.1778982211,-0.0999  
88304\H,1.8657224232,4.0053706336,0.4596901818\C,-1.1507122595,5.18326  
46584,-0.6881339567\H,-2.6589715489,3.957725351,-1.6628980073\H,0.5459  
643106,6.1085863991,0.2965814\H,-1.7288844868,6.1106362164,-0.75651800  
71\C,3.8945728147,-0.6237761077,0.1990881223\C,3.9160879607,-2.0329676  
796,0.3596411908\C,5.1181818645,0.0858507016,0.2613852322\C,5.12257357  
95,-2.7077991794,0.5739153047\H,2.9715798502,-2.5849623799,0.316901668  
9\C,6.3176604412,-0.6088279098,0.4771300781\H,5.1111507544,1.169542194  
4,0.1453409732\C,6.3369793193,-2.0031721421,0.6346759127\H,5.110907388  
9,-3.7969441673,0.6952106386\H,7.2543787779,-0.0411499535,0.5220293205  
\H,7.2807090808,-2.5326685416,0.8027146422\H,-3.3285699748,-0.19949475  
41,-1.3996856985\\Version=ES64L-G09RevD.01\State=1-A\HF=-1283.2697754\  
RMSD=5.525e-09\RMSF=9.967e-07\Dipole=-6.0005938,-2.775788,-0.457033\Qu  
adrapole=1.2382403,1.8582955,-3.0965358,3.0841969,4.5751633,4.9025814\  
PG=C01 [X(C23H29N3O3)]\@

## 14. References

- (1) McMahon, M. T.; Gilad, A. A.; Zhou, J.; Sun, P. Z.; Bulte, J. W. M.; van Zijl, P. C. M. *Magn. Reson. Med.* **2006**, 55, 836.
- (2) Woessner, D. E.; Zhang, S.; Merritt, M. E.; Sherry, A. D. *Magn. Reson. Med.* **2005**, 53, 790.
- (3) Zhou J.; van Zijl P. C. M. *Prog. Nucl. Magn. Reson. Spectrosc.* **2006**, 48, 109.
